# Supplementary material for: Electrochemical assessment of phenol and triazoles derived from phenol (BPT) on API 5L X52 steel immersed in 1 M HCl
Source: Royal Society of Chemistry journal article supplement (doi:10.1039/c6ra09832k), 2016-01-01
Supplement: c6ra09832k1.pdf [file c6ra09832k1.pdf]

Electronic Supplementary Information

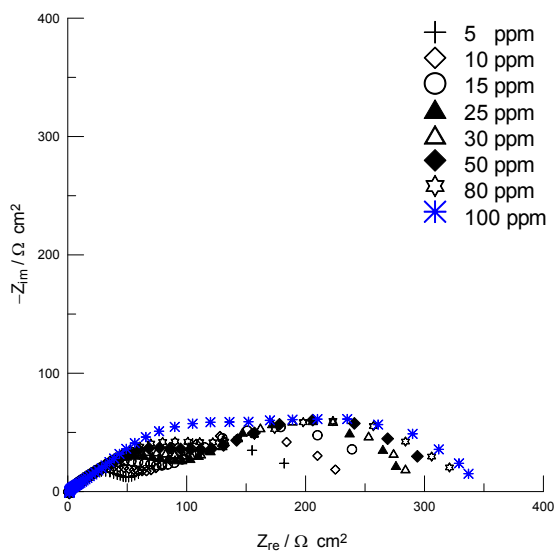

**Figure S1.** Nyquist diagram of phenol alkyne for API 5L X52 steel immersed in 1 M HCl under static conditions.

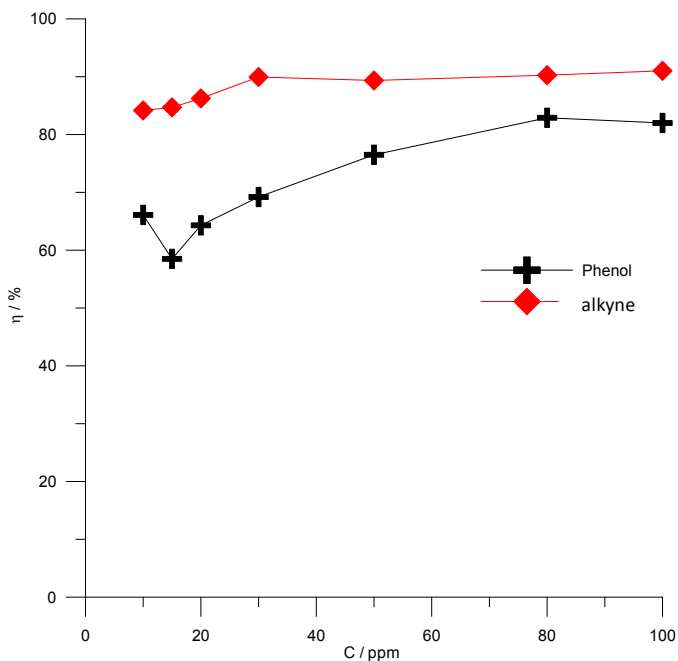

**Figure S2.** Inhibition efficiency variation when phenol and its corresponding alkyne were evaluated as a function of concentration for API 5L X52 steel immersed in 1 M HCl.
